# Supplementary material
Source: ML conference proceedings conference paper supplement (https://proceedings.mlr.press/v119/jia20a.html)
Supplement: Supplementary file [file jia20a-supp.pdf]

---

## Supplementary Material for Information-Theoretic Local Minima Characterization and Regularization

---

### A. Proof of Equation 1 in Section 4

Let us first review the Equation 1 in Section 4:

$$\mathcal{I}_{\mathcal{S}}(w_0) = \nabla_w^2 \mathcal{L}(\mathcal{S}, w_0) = \mathbb{E}_{(x, c_x) \sim \mathcal{S}} [\nabla_w \ln p_{w_0}(c_x) \nabla_w \ln p_{w_0}(c_x)^T]$$

To prove this equation, it suffices to prove the following equality:

$$-\nabla_w^2 \ell \mathcal{L}_{\mathcal{S}}(w) = \sum_{(x, y) \in \mathcal{S}} \sum_{i=1}^K y_i [\nabla_w \ln p(c_x = i|x; w) \nabla_w \ln p(c_x = i|x; w)^T]$$

For convenience, we change the notation of the local minimum from  $w_0$  to  $w$  and further denote  $p(c_x = i|x; w)$  as  $p_w^x(i)$ . Since  $-\nabla_w^2 \ell \mathcal{L}_{\mathcal{S}}(w) = -\sum_{(x, y) \in \mathcal{S}} \sum_{i=1}^K y_i \nabla_w^2 \ln p_w^x(i)$ , for each  $(x, y) \in \mathcal{S}$  and  $i \in \{1, 2, \dots, K\}$ , we have:

$$\begin{aligned} [\nabla_w^2 \ln p_w^x(i)]_{j,k} &= \frac{\partial^2}{\partial w_j \partial w_k} \ln p_w^x(i) \\ &= \frac{\partial}{\partial w_j} \left( \frac{\frac{\partial}{\partial w_k} p_w^x(i)}{p_w^x(i)} \right) \\ &= \frac{p_w^x(i) \frac{\partial^2}{\partial w_j \partial w_k} p_w^x(i)}{p_w^x(i)^2} - \frac{\frac{\partial}{\partial w_j} p_w^x(i)}{p_w^x(i)} \frac{\frac{\partial}{\partial w_k} p_w^x(i)}{p_w^x(i)} \\ &= \frac{\frac{\partial^2}{\partial w_j \partial w_k} p_w^x(i)}{p_w^x(i)} - \frac{\partial}{\partial w_j} \ln p_w^x(i) \cdot \frac{\partial}{\partial w_k} \ln p_w^x(i) \end{aligned} \quad (\text{a})$$

Since  $w_0$  is a local minimum of full training accuracy, as described in Section 4, and  $y_i = p_w^x(i)$  for  $i \in \{1, 2, \dots, K\}$ , when taking the double summation, the first term in Equation a becomes:

$$\sum_{(x, y) \in \mathcal{S}} \sum_{i=1}^K \frac{\partial^2}{\partial w_j \partial w_k} p_w^x(i) = \frac{\partial^2}{\partial w_j \partial w_k} \sum_{(x, y) \in \mathcal{S}} \sum_{i=1}^K p_w^x(i) = \frac{\partial^2}{\partial w_j \partial w_k} N = 0$$

Then it follows that:

$$[\nabla_w^2 \ell \mathcal{L}_{\mathcal{S}}(w)]_{j,k} = - \sum_{(x, y) \in \mathcal{S}} \sum_{i=1}^K y_i [\nabla_w \ln p_w^x(i) \nabla_w \ln p_w^x(i)^T]_{j,k}$$

### B. Proof of the Generalization Bound in Section 5.2

Remind that in Section 5.2 we pick a uniform prior  $\mathcal{P}$  over  $w \in \mathcal{M}(w_0)$  and pick the posterior  $\mathcal{Q}$  of density  $q(w) \propto e^{-|\mathcal{L}_0 - \mathcal{L}(\mathcal{S}, w)|}$  with  $\mathcal{L}_0 \triangleq \mathcal{L}(\mathcal{S}, w_0)$ . Then we have the upper bound of the expected generalization loss  $\mathbb{E}_{w \sim \mathcal{Q}}[\mathcal{L}(\mathcal{D}, w)]$  in terms of the expected training loss  $\mathbb{E}_{w \sim \mathcal{Q}}[\mathcal{L}(\mathcal{S}, w)]$  and  $\gamma(w_0)$ .

**Theorem A.** *Given  $|\mathcal{S}| = N$ ,  $\mathcal{D}$ ,  $\mathcal{L}(\mathcal{S}, w)$  and  $\mathcal{L}(\mathcal{D}, w)$  described in Section 3, a local minimum  $w_0$ , the volume  $V$  of  $\mathcal{M}(w_0)$  sufficiently small, the Assumption 1 & 2 satisfied, and  $\mathcal{P}, \mathcal{Q}$  defined above, for any  $\delta \in (0, 1]$ , we have with probability at least  $1 - \delta$  that:*

$$\mathbb{E}_{w \sim \mathcal{Q}}[\mathcal{L}(\mathcal{D}, w)] \leq \mathbb{E}_{w \sim \mathcal{Q}}[\mathcal{L}(\mathcal{S}, w)] + 2\sqrt{\frac{2\mathcal{L}_0 + 2\mathcal{A} + \ln \frac{2N}{\delta}}{N-1}} \quad \text{where } \mathcal{A} = \frac{WV^{\frac{2}{W}} \pi^{\frac{1}{W}} e^{\gamma(w_0)}/W}{4\pi e}$$

To prove this theorem, let us review the PAC-Bayes Theorem in [McAllester \(2003\)](#):

**Theorem B.** *For any data distribution  $\mathcal{D}$  and a loss function  $\mathcal{L}(\cdot, \cdot) \in [0, 1]$ , let  $\mathcal{L}(\mathcal{D}, w)$  and  $\mathcal{L}(\mathcal{S}, w)$  be the expected loss and training loss respectively for the model parameterized by  $w$ , with the training set  $|\mathcal{S}| = N$ . For any prior distribution  $\mathcal{P}$  with a model class  $\mathcal{C}$  as its support, any posterior distribution  $\mathcal{Q}$  over  $\mathcal{C}$  (not necessarily Bayesian posterior), and for any  $\delta \in (0, 1]$ , we have with probability at least  $1 - \delta$  that:*

$$\mathbb{E}_{w \sim \mathcal{Q}} [\mathcal{L}(\mathcal{D}, w)] \leq \mathbb{E}_{w \sim \mathcal{Q}} [\mathcal{L}(\mathcal{S}, w)] + 2\sqrt{\frac{2D_{\text{KL}}(\mathcal{Q}||\mathcal{P}) + \ln \frac{2N}{\delta}}{N-1}}$$

**PAC-Bayes (McAllester)** *For a data distribution  $\mathcal{D}$  and a loss  $\mathcal{L}(\cdot, \cdot) \in [0, 1]$ , let  $\mathcal{L}(\mathcal{D}, w)$  and  $\mathcal{L}(\mathcal{S}, w)$  be the expected loss and the training loss; the training set  $|\mathcal{S}| = N$  is sampled from  $\mathcal{D}$ . Given arbitrary prior  $\mathcal{P}$  and posterior  $\mathcal{Q}$  (no need to be Bayesian posterior) supported on a model class  $\mathcal{C}$ , and for any  $\delta > 0$ , we have, with probability at least  $1 - \delta$ , that*

$$\mathbb{E}_{w \sim \mathcal{Q}} [\mathcal{L}(\mathcal{D}, w)] \leq \mathbb{E}_{w \sim \mathcal{Q}} [\mathcal{L}(\mathcal{S}, w)] + 2\sqrt{\frac{2D_{\text{KL}}(\mathcal{Q}||\mathcal{P}) + \ln \frac{2N}{\delta}}{N-1}}$$

As  $e^{\gamma(w_0)} = |\mathcal{I}_{\mathcal{S}}(w_0)|$ , we can rewrite the generalization bound we want to prove above as:

$$\mathbb{E}_{w \sim \mathcal{Q}} [\mathcal{L}(\mathcal{D}, w)] \leq \mathbb{E}_{w \sim \mathcal{Q}} [\mathcal{L}(\mathcal{S}, w)] + 2\sqrt{\frac{W \cdot V^{2/W} \pi^{1/W} |\mathcal{I}_{\mathcal{S}}(w_0)|^{1/W} + 4\pi e \mathcal{L}_0 + 2\pi e \ln \frac{2N}{\delta}}{2\pi e(N-1)}}$$

As defined in Section 5.2, given the model class  $\mathcal{M}(w_0)$ , whose volume is  $V$ , for the neural network  $f_w$ , the uniform prior  $\mathcal{P}$  attains the probability density function  $p(w) = \frac{1}{V}$  for any  $w \in \mathcal{M}(w_0)$  and the posterior  $\mathcal{Q}$  has density  $q(w) \propto e^{-|\mathcal{L}(\mathcal{S}, w) - \mathcal{L}_0|}$ . Based on Assumption 2 in Section 5.2 and the observed Fisher information  $\mathcal{I}_{\mathcal{S}}(w_0)$ , especially the Equation 2 derived in Section 4, we have:

$$\mathcal{L}(\mathcal{S}, w) = \mathcal{L}_0 + \frac{1}{2}(w - w_0)^T \mathcal{I}_{\mathcal{S}}(w_0)(w - w_0) \quad \forall w \in \mathcal{M}(w_0)$$

Denote  $\Sigma = [\mathcal{I}_{\mathcal{S}}(w_0)]^{-1} = [\nabla_w^2 \mathcal{L}(\mathcal{S}, w_0)]^{-1}$ . Then  $\mathcal{Q}$  is a truncated multivariate Gaussian distribution whose density function  $q$  is:

$$\begin{aligned} q(w; w_0, \Sigma) &= \frac{\sqrt{(2\pi)^{-n} |\Sigma|^{-1}} \exp\{-\frac{1}{2}(w - w_0)^T \Sigma^{-1}(w - w_0)\}}{\int_{\mathcal{M}(w_0)} \sqrt{(2\pi)^{-n} |\Sigma|^{-1}} \exp\{-\frac{1}{2}(w - w_0)^T \Sigma^{-1}(w - w_0)\} dw} \\ &= \frac{\exp\{-\frac{1}{2}(w - w_0)^T \Sigma^{-1}(w - w_0)\}}{\int_{\mathcal{M}(w_0)} \exp\{-\frac{1}{2}(w - w_0)^T \Sigma^{-1}(w - w_0)\} dw} \end{aligned} \quad (\text{b})$$

Denote the denominator of Equation **b** as  $\mathbf{Z}$  and define:

$$g(w; w_0, \Sigma) \triangleq -\frac{1}{2}(w - w_0)^T \Sigma^{-1}(w - w_0) \leq 0$$

Then  $q$  can also be written as:

$$q(w; w_0, \Sigma) = \frac{\exp\{g(w; w_0, \Sigma)\}}{\mathbf{Z}}$$

In order to derive a generalization bound in the form of the PAC-Bayes Theorem, it suffices to prove an upper bound of the

KL divergence term:

$$\begin{aligned}
 D_{\text{KL}}(\mathcal{Q}||\mathcal{P}) &= \mathbb{E}_{w \sim \mathcal{Q}} \ln \frac{q(w)}{p(w)} \\
 &= - \mathbb{E}_{w \sim \mathcal{Q}} \ln \frac{1}{V} + \mathbb{E}_{w \sim \mathcal{Q}} \ln q(w) \\
 &= \ln V + \mathbb{E}_{w \sim \mathcal{Q}} g(w; w_0, \Sigma) + \ln \frac{1}{\mathbf{Z}} \\
 &\leq \ln V + \mathbb{E}_{w \sim \mathcal{Q}} 0 - \ln \left( \int_{\mathcal{M}(w_0)} \exp\{g(w; w_0, \Sigma)\} dw \right) \\
 &\leq \ln V - \ln \left( \int_{\mathcal{M}(w_0)} \exp\left\{- \max_{w \in \mathcal{M}(w_0)} \mathcal{L}(\mathcal{S}, w)\right\} dw \right) \\
 &= \ln V - \ln \left( V \cdot \exp\left\{- \max_{w \in \mathcal{M}(w_0)} \mathcal{L}(\mathcal{S}, w)\right\} \right) \\
 &= \ln V - \ln V + h = h
 \end{aligned}$$

where  $h$  is the height of  $\mathcal{M}(w_0)$  defined in Section 5.1. For convenience, we shift down  $\mathcal{L}(\mathcal{S}, w)$  by  $\mathcal{L}_0$  and denote the shifted training loss  $\mathcal{L}_0(w) \triangleq \mathcal{L}(\mathcal{S}, w) - \mathcal{L}_0$  so that  $\mathcal{L}_0(w_0) = 0$ . Then

$$\mathcal{L}_0(w) = \frac{1}{2}(w - w_0)^T \Sigma^{-1} (w - w_0) \quad \forall w \in \mathcal{M}(w_0)$$

Furthermore, the following two sets are equivalent

$$\{w \in \mathbb{R}^W : \mathcal{L}(\mathcal{S}, w) = h\} = \{w \in \mathbb{R}^W : \mathcal{L}_0(w) = h - \mathcal{L}_0\}$$

both of which are the  $W$ -dimensional hyperellipsoid given by the equation  $\mathcal{L}_0(w) = h - \mathcal{L}_0$ , which can be converted to the standard form for hyperellipsoids as:

$$(w - w_0)^T \frac{\Sigma^{-1}}{2(h - \mathcal{L}_0)} (w - w_0) = 1$$

The volume enclosed by this hyperellipsoid is exactly the volume of  $\mathcal{M}(w_0)$ , i.e.,  $V$ ; so we have

$$\frac{\pi^{W/2}}{\Gamma(\frac{W}{2} + 1)} \sqrt{2^W (h - \mathcal{L}_0)^W |\Sigma|} = V$$

Solve for  $h$ , with the Stirling's approximation for factorial  $\Gamma(n + 1) \approx \sqrt{2\pi n} \left(\frac{n}{e}\right)^n$ , we have

$$h = \mathcal{L}_0 + \frac{(V \cdot \Gamma(\frac{W}{2} + 1))^{2/W}}{2\pi |\Sigma|^{1/W}} \approx \mathcal{L}_0 + \frac{V^{2/W} \pi^{1/W} W^{(W+1)/W} |\mathcal{I}_{\mathcal{S}}(w_0)|^{1/W}}{4\pi e}$$

where  $\Gamma(\cdot)$  denotes the Gamma function. Notice that for modern DNNs we have  $W \gg 1$ , and so  $W^{\frac{W+1}{W}} \approx W$ . We finally can derive the generalization bound in the form of the PAC-Bayes Theorem as:

$$\mathbb{E}_{w \sim \mathcal{Q}} [\mathcal{L}(\mathcal{D}, w)] \leq \mathbb{E}_{w \sim \mathcal{Q}} [\mathcal{L}(\mathcal{S}, w)] + 2\sqrt{\frac{W \cdot V^{2/W} \pi^{1/W} |\mathcal{I}_{\mathcal{S}}(w_0)|^{1/W} + 4\pi e \mathcal{L}_0 + 2\pi e \ln \frac{2N}{\delta}}{2\pi e(N - 1)}}$$

### C. Derivation of Equation 6 in Section 5.3

First, let us present the well-known theorem in linear algebra that relates the eigenvalues of a matrix to those of its sub-matrices.

**Theorem C.** Given an  $n \times n$  real symmetric matrix  $A$  with eigenvalues  $\lambda_1 \leq \dots \leq \lambda_n$ , for any  $k < n$  denote its principal sub-matrix as  $B$  obtained from removing  $n - k$  rows and columns from  $A$ . Let  $\nu_1 \leq \dots \leq \nu_k$  be the eigenvalues of  $B$ . Then for any  $1 \leq r \leq k$ , we have  $\lambda_r \leq \nu_r \leq \lambda_{r+n-k}$ .

Let  $\{\nu_n\}_{n=1}^{N'}$  be the eigenvalues of  $\frac{1}{W}\xi^t(w_0)$ , which is a  $N' \times N'$  sub-matrix of  $\mathcal{I}_{\mathcal{S}'}(w_0)$ ; then

$$\hat{\gamma}(w_0) = \frac{1}{T} \sum_{t=1}^T \ln |\xi^t(w_0)| = \frac{1}{T} \sum_{t=1}^T \ln |W \cdot \frac{1}{W} \xi^t(w_0)| = N' \ln W + \frac{1}{T} \sum_{t=1}^T \sum_{n=1}^{N'} \ln \nu_n$$

Theorem C gives the relation between  $\nu_n$  and  $\lambda_n$ , defined above and in Section 5.3 as the  $n^{\text{th}}$  smallest eigenvalues of  $\frac{1}{W}\xi^t(w_0)$  and that of  $\mathcal{I}_{\mathcal{S}'}(w_0)$ , respectively. For sufficiently large  $N'$ , we can use  $\nu_n$  to approximate  $\lambda_n$ , which ignores the eigenvalues of  $\mathcal{I}_{\mathcal{S}'}(w_0)$  larger than  $\lambda_{N'}$ . This is reasonable when estimating  $\gamma(w_0)$ , since in general the majority of the eigenvalues of the Hessian for DNNs are close to zero with only a few large ‘‘outliers’’, and so the smallest eigenvalues are the dominant terms in  $\gamma(w_0)$  (Pennington & Worah, 2018; Sagun et al., 2018; Karakida et al., 2019). A specific bound of the eigenvalues remains an open question, though. In short, we have  $\sum_{n=1}^{N'} \nu_n \approx \sum_{n=1}^{N'} \lambda'_n$  and consequently:

$$\begin{aligned} \frac{W}{N'} \hat{\gamma}(w_0) + W \ln \frac{1}{W} &= \frac{W}{N'} \hat{\gamma}(w_0) - W \ln W \\ &= \frac{W}{N'} (\hat{\gamma}(w_0) - N' \ln W) \\ &= \frac{1}{T} \sum_{t=1}^T \frac{W}{N'} \sum_{n=1}^{N'} \ln \nu_n \\ &\approx \frac{1}{T} \sum_{t=1}^T \frac{W}{N'} \sum_{n=1}^{N'} \ln \lambda'_n \end{aligned}$$

Finally we we have

$$\lim_{T \rightarrow \infty} \frac{1}{T} \sum_{t=1}^T \frac{W}{N'} \sum_{n=1}^{N'} \ln \lambda'_n = \gamma(w_0)$$

## D. Details of Calculating the Metrics in Section 7.1

For the following three metrics, we apply estimation by sampling a subset  $\mathcal{S}^t$  from the full training set  $\mathcal{S}$  for  $T$  times and averaging the results.

- Frobenius norm:  $\|\nabla_w^2 \mathcal{L}(\mathcal{S}, w)\|_F^2$
- Spectral radius:  $\rho(\nabla_w^2 \mathcal{L}(\mathcal{S}, w))$
- Ours:  $\hat{\gamma}(w) = \frac{1}{T} \sum_{t=1}^T \ln |\xi(\mathcal{S}^t, w_0)|$

For the Frobenius norm based metric, from Equation 1 & 2 in Section 4 we have:

$$\|\nabla_w^2 \mathcal{L}(\mathcal{S}, w)\|_F^2 = \|\mathcal{I}_{\mathcal{S}}(w)\|_F^2 = \frac{1}{N} \sum_{(x,y) \in \mathcal{S}} \sum_{i=1}^K \left\| (\nabla_w [\ell_x(w_0)]_i) (\nabla_w [\ell_x(w_0)]_i)^T \right\|_F^2$$

We define  $\mathbf{y} = \arg \max(y)$ . Similar to Equation 4 in Section 5.3, we approximate  $y$  by  $\tilde{y}$  and so

$$\|\nabla_w^2 \mathcal{L}(\mathcal{S}, w)\|_F^2 \approx \frac{1}{N} \sum_{(x,y) \in \mathcal{S}} \left\| (\nabla_w [\ell_x(w_0)]_{\mathbf{y}}) (\nabla_w [\ell_x(w_0)]_{\mathbf{y}})^T \right\|_F^2$$

Summing over the entire Hessian matrix is too expensive as there are  $W \times W \times N$  entries in total. We therefore estimate the quantity by first sampling a subset  $\mathcal{S}^t \subset \mathcal{S}$  and then sampling 100,000 entries of  $(\nabla_w[\ell_x(w_0)]_{\mathbf{y}})(\nabla_w[\ell_x(w_0)]_{\mathbf{y}})^T$ . We perform the estimation  $T$  times and average the results, similar to the approach when computing  $\hat{\gamma}(w)$ .

Also by Equation 2 and the approximation in Equation 4, the spectral radius of Hessian is equivalent to the squared spectral norm of  $1/\sqrt{N}\mathbf{J}_w[\tilde{\mathcal{L}}(\mathcal{S}, w)]$ . We also perform estimation (with irrelevant scaling constants dropped) by sampling  $\mathcal{S}^t$  for  $T$  times, i.e., via  $\frac{1}{T} \sum_t \|\mathbf{J}_w[\tilde{\mathcal{L}}(\mathcal{S}^t, w)]\|_2^2$ .

Furthermore, in all our experiments that involves samplings  $\mathcal{S}^t$ , we set  $|\mathcal{S}^t| = N' = T = 100$ .

## E. Architecture And Training Details in Section 7

Architecture details are as below

- The plain CNN is a 6-layer convolutional neural network similar to the baseline in Lee et al. (2016) yet without the “mlpconv” layers (resulting in a much fewer number of parameters). Specifically, the 6 layers has numbers of filters as  $\{64, 64, 128, 128, 192, 192\}$ . We use  $3 \times 3$  kernel size and ReLU as the activation function. After the second and the fourth convolutional layer we insert a  $2 \times 2$  max pooling operation. After the last convolutional layer, we apply a global average pooling before the final softmax classifier.
- For ResNet-20, WRN-28-2-B(3,3), WRN-18-1.5 and DenseNet-BC-k=12, we use the same architecture as in their original papers, respectively.

The training details are

- For the plain CNN, we initialize the weights according to the scheme in He et al. (2016) and apply l2 regularization of a coefficient 0.0001. We perform standard data augmentation, the one denoted `4-crop-f` in Section 7.1. We use stochastic gradient descent with Nesterov momentum set to 0.9 and a batch size of 128. We train 200 epochs in total with the learning rate initially set to 0.01 and then divided by 10 at epoch 100 and 150.
- For ResNet-20, WRN-28-2-B(3,3), WRN-18-1.5 and DenseNet-BC-k=12, we use the same hyper-parameters, training schemes, data augmentation schemes, optimization methods, etc., as those in their original papers, respectively. An exception is that for WRN-18-1.5 on ImageNet, we first resize all training images to  $128 \times 128$ , and then apply random crop (of size  $114 \times 114$ ), horizontal flip and standard color jittering together with mean channels subtraction as in He et al. (2016). We adopt single crop (central crop) testing for the down-sampled  $128 \times 128$  validation images.

## References

- He, K., Zhang, X., Ren, S., and Sun, J. Deep residual learning for image recognition. In *Proceedings of the IEEE conference on computer vision and pattern recognition*, pp. 770–778, 2016.
- Karakida, R., Akaho, S., and Amari, S.-i. Universal statistics of fisher information in deep neural networks: Mean field approach. In *The 22nd International Conference on Artificial Intelligence and Statistics*, pp. 1032–1041, 2019.
- Lee, C.-Y., Gallagher, P. W., and Tu, Z. Generalizing pooling functions in convolutional neural networks: Mixed, gated, and tree. In *Artificial Intelligence and Statistics*, pp. 464–472, 2016.
- McAllester, D. Simplified pac-bayesian margin bounds. In *Learning theory and Kernel machines*, pp. 203–215. Springer, 2003.
- Pennington, J. and Worah, P. The spectrum of the fisher information matrix of a single-hidden-layer neural network. In *Advances in Neural Information Processing Systems*, pp. 5410–5419, 2018.
- Sagun, L., Evci, U., Guney, V. U., Dauphin, Y., and Bottou, L. Empirical analysis of the hessian of over-parametrized neural networks, 2018. URL <https://openreview.net/forum?id=rJrTwxbCb>.
